# Supplementary material
Source: MDPI journal article supplement (https://www.mdpi.com/2072-4292/14/4/908)
Supplement: s1 [file s1]

**Table S1.** Data Information

| Type                      |                    | Data Set                                                                                                            | Unit                           | Resolution |
|---------------------------|--------------------|---------------------------------------------------------------------------------------------------------------------|--------------------------------|------------|
| Regional<br>geomorphology | elevation          | SRTMDEMUTM digital elevation data product                                                                           | m                              | 90m        |
|                           | slope              | SRTMSLOPE slope data product                                                                                        | °                              |            |
|                           | aspect             | SRTMASPECT aspect data                                                                                              | °                              |            |
| Climate change            | temperature        | 1-km monthly mean temperature dataset for china [57]                                                                | 0.1°C                          | 1km        |
|                           | precipitation      | 1-km monthly precipitation dataset for China [58]                                                                   | 0.1mm                          |            |
|                           | solar radiation    | High spatial resolution (10km) surface solar radiation dataset with by merging sunshine hours over China China [59] | W/m <sup>2</sup>               | 10km       |
|                           | evapotranspiration | Terrestrial evapotranspiration dataset across China [60]                                                            | mm                             |            |
| Ecological environment    | soil moisture      | Soil moisture in China dataset [61]                                                                                 | m <sup>3</sup> /m <sup>3</sup> | 0.05°      |
|                           | clay/sand content  | A China soil characteristics dataset [62]                                                                           | %                              | 0.0083°    |
|                           | NDVI               | MOD3Q1 product                                                                                                      | 1                              | 250m       |
| Permafrost                | LST                | Daily 1-km all-weather land surface temperature dataset for Western China [63]                                      | °C                             | 1km        |
| environment               | LRad               | China meteorological forcing dataset [64]                                                                           | W/m <sup>2</sup>               | 10km       |
| Water environment         | lake               | China lake dataset [65]                                                                                             | m <sup>2</sup>                 | -          |

Note: NDVI: Normalized difference vegetation index; LST: Land surface temperature; LRad: download long-wave radiatio

**Table S2.** Response Relationship between Elevation and Risk Factors

| Factors                              | Maximum Value |              | Minimum Value |              | Variation Characteristics |                                               |
|--------------------------------------|---------------|--------------|---------------|--------------|---------------------------|-----------------------------------------------|
|                                      | mean          | region       | mean          | region       | criticality               | characteristics                               |
| MAAT (°C)                            | -2.01         | < 4200m      | -17.12        | > 6000m      |                           | decrease slowly, then quickly                 |
| MAP (mm)                             | 14.83         | < 4200m      | 37.70         | > 6000m      | level 7                   | increase quickly, then slowly                 |
| SR (W/m <sup>2</sup> )               | 2586.10       | 5200 ~ 5400m | 2470.93       | < 4200m      |                           | increase first quickly, then decrease quickly |
| ET (mm)                              | 369.23        | 5200 ~ 5400m | 107.75        | > 6000m      | level 7                   | increase first slowly, then decrease quickly  |
| FVC (%)                              | 38.34         | 4800 ~ 5000m | 8.25          | > 6000m      | level 5                   | increase first slowly, then decrease quickly  |
| SM (m <sup>3</sup> /m <sup>3</sup> ) | 0.0640        | < 4200m      | 0.0969        | 4600 ~ 4800m | level 4                   | increase first quickly, then decrease quickly |
| CC1 (%)                              | 13.53         | 4600 ~ 4800m | 6.31          | 5800 ~ 6000m | level 4                   | increase first, then decrease                 |
| CC2 (%)                              | 17.71         | 4600 ~ 4800m | 11.26         | > 6000m      | level 4                   |                                               |
| SC1 (%)                              | 56.94         | 4200 ~ 4400m | 36.20         | 5800 ~ 6000m | level 3, 5                | decrease first, then increase                 |
| SC2 (%)                              | 54.69         | 4200 ~ 4400m | 36.67         | 5800 ~ 6000m | level 3, 4                | and finally decrease                          |
| ABC (MPa)                            | 0.23          | < 4200m      | 1.31          | > 6000m      | level 7                   | decrease slowly, then quickly                 |
| ALT (m)                              | 3.74          | > 6000m      | 1.42          | 5000 ~ 5200m | level 6                   | decrease first, then increase                 |
| VIC (%)                              | 29.38         | 4600 ~ 4800m | 14.89         | 5200 ~ 5400m | level 7                   | increase first, then decrease to about 15%    |
| MAGT (°C)                            | 0.40          | < 4200m      | -4.97         | > 6000m      | level 7                   | decrease slowly, then quickly                 |
| MAST (°C)                            | 2.96          | < 4200m      | -14.59        | > 6000m      | level 7                   | decrease slowly, then quickly                 |

**Table S3.** Response Relationship between Slope and Risk Factors

| Factors                              | Peak Value |          | Sub-peak Value |          | Valley Value |          |
|--------------------------------------|------------|----------|----------------|----------|--------------|----------|
|                                      | mean       | region   | mean           | region   | mean         | region   |
| MAAT (°C)                            | -4.11      | 0 ~ 3°   | -5.01          | 3 ~ 6°   | -6.63        | > 15°    |
| MAP (mm)                             | 29.62      | 10 ~ 15° | 29.41          | > 15°    | 24.36        | 0 ~ 3°   |
| SR (W/m <sup>2</sup> )               | 2583.78    | 0 ~ 3°   | 2583.08        | 3 ~ 6°   | 2553.07      | > 15°    |
| ET (mm)                              | 354.36     | 10 ~ 15° | 349.11         | 6 ~ 10°  | 337.02       | > 15°    |
| FVC (%)                              | 37.96      | 3 ~ 6°   | 37.87          | 6 ~ 10°  | 31.38        | > 15°    |
| SM (m <sup>3</sup> /m <sup>3</sup> ) | 0.0938     | 3 ~ 6°   | 0.0931         | 0 ~ 3°   | 0.0819       | > 15°    |
| CC1 (%)                              | 12.75      | 0 ~ 3°   | 12.73          | 0 ~ 3°   | 9.73         | > 15°    |
| CC2 (%)                              | 17.71      | 0 ~ 3°   | 17.24          | 3 ~ 6°   | 14.41        | > 15°    |
| SC1 (%)                              | 52.74      | > 15°    | 51.99          | 10 ~ 15° | 43.92        | 0 ~ 3°   |
| SC2 (%)                              | 44.08      | > 15°    | 42.94          | 10 ~ 15° | 41.31        | 0 ~ 3°   |
| ABC (MPa)                            | 0.59       | > 15°    | 0.56           | 10 ~ 15° | 0.41         | 0 ~ 3°   |
| ALT (m)                              | 2.83       | 0 ~ 3°   | 2.18           | 3 ~ 6°   | 1.78         | 10 ~ 15° |
| VIC (%)                              | 28.98      | 0 ~ 3°   | 28.77          | 3 ~ 6°   | 13.50        | > 15°    |
| MAGT (°C)                            | -0.55      | 0 ~ 3°   | -0.88          | 3 ~ 6°   | -1.41        | > 15°    |
| MAST (°C)                            | 0.59       | 0 ~ 3°   | 0.10           | 3 ~ 6°   | -1.26        | > 15°    |

**Table S4.** Response Relationship between Aspect and Risk Factors

| Factors                              | Peak Value |           | Sub-peak Value |                 | Valley Value |           |
|--------------------------------------|------------|-----------|----------------|-----------------|--------------|-----------|
|                                      | mean       | region    | mean           | region          | mean         | region    |
| MAAT (°C)                            | -4.66      | southeast | -4.67          | east, northeast | -5.19        | west      |
| MAP (mm)                             | 26.78      | west      | 26.61          | northwest       | 25.68        | southeast |
| SR (W/m <sup>2</sup> )               | 2583.75    | southeast | 2581.86        | east            | 2574.69      | northwest |
| ET (mm)                              | 347.40     | northeast | 347.39         | east            | 342.92       | southwest |
| FVC (%)                              | 35.13      | northeast | 35.11          | north           | 33.20        | southwest |
| SM (m <sup>3</sup> /m <sup>3</sup> ) | 0.0929     | northeast | 0.0928         | southeast       | 0.0900       | west      |
| CC1 (%)                              | 12.34      | southeast | 12.28          | south           | 11.84        | west      |
| CC2 (%)                              | 17.39      | southeast | 17.18          | east            | 16.63        | southwest |
| SC1 (%)                              | 47.55      | southwest | 47.29          | west            | 45.70        | southeast |
| SC2 (%)                              | 42.67      | southwest | 42.64          | south           | 41.04        | east      |
| ABC (MPa)                            | 0.50       | southwest | 0.49           | west            | 0.44         | northeast |
| ALT (m)                              | 2.54       | southeast | 2.53           | east            | 2.30         | west      |
| VIC (%)                              | 28.35      | southwest | 27.81          | west            | 24.10        | northeast |
| MAGT (°C)                            | -0.62      | northeast | -0.63          | north           | -1.03        | southwest |
| MAST (°C)                            | 0.37       | southeast | 0.25           | east            | -0.24        | northwest |

**Table S5.** Response Relationship between RDLS and Risk Factors

| Factors                              | Peak Value |                             | Sub-peak Value |                     | Valley Value |                             |
|--------------------------------------|------------|-----------------------------|----------------|---------------------|--------------|-----------------------------|
|                                      | mean       | region                      | mean           | region              | mean         | region                      |
| MAAT (°C)                            | -3.89      | plain                       | -4.43          | platform            | -8.70        | moderate relief<br>mountain |
| MAP (mm)                             | 30.13      | low relief mountain         | 27.77          | hill                | 23.66        | plain                       |
| SR (W/m <sup>2</sup> )               | 2584.58    | platform                    | 2584.47        | plain               | 2482.36      | moderate relief<br>mountain |
| ET (mm)                              | 350.53     | hill                        | 347.90         | low relief mountain | 235.73       | moderate relief<br>mountain |
| FVC (%)                              | 38.42      | plain                       | 35.86          | platform            | 20.07        | moderate relief<br>mountain |
| SM (m <sup>3</sup> /m <sup>3</sup> ) | 0.0942     | hill                        | 0.0941         | platform            | 0.0682       | moderate relief<br>mountain |
| CC1 (%)                              | 13.19      | platform                    | 12.65          | plain               | 8.77         | moderate relief<br>mountain |
| CC2 (%)                              | 17.90      | plain                       | 17.23          | platform            | 13.06        | moderate relief<br>mountain |
| SC1 (%)                              | 57.27      | moderate relief<br>mountain | 52.30          | low relief mountain | 42.79        | plain                       |
| SC2 (%)                              | 59.16      | moderate relief<br>mountain | 42.49          | platform            | 40.87        | plain                       |
| ABC (MPa)                            | 0.73       | moderate relief<br>mountain | 0.57           | low relief mountain | 0.40         | plain                       |
| ALT (m)                              | 2.98       | plain                       | 2.58           | platform            | 1.85         | low relief mountain         |
| VIC (%)                              | 29.90      | platform                    | 29.18          | plain               | 10.46        | moderate relief<br>mountain |

**Table S6.** Response Relationship between VIC and Risk Factors

| Factors                              | Peak Value |        | Sub-peak Value |        | Valley Value |        |
|--------------------------------------|------------|--------|----------------|--------|--------------|--------|
|                                      | mean       | region | mean           | region | mean         | region |
| MAAT (°C)                            | -3.89      | talik  | -4.08          | IR     | -5.63        | IP     |
| MAP (mm)                             | 32.23      | IP     | 26.28          | IC     | 24.24        | IL     |
| SR (W/m <sup>2</sup> )               | 2591.42    | IP     | 2590.96        | IR     | 2562.05      | IL     |
| ET (mm)                              | 370.06     | IP     | 352.32         | IR     | 334.94       | IL     |
| FVC (%)                              | 35.80      | IS     | 34.99          | IP     | 31.81        | talik  |
| SM (m <sup>3</sup> /m <sup>3</sup> ) | 0.0985     | IR     | 0.0940         | IS     | 0.0881       | IC     |
| CC1 (%)                              | 13.07      | IR     | 12.27          | talik  | 9.63         | IP     |
| CC2 (%)                              | 18.27      | talik  | 17.72          | IS     | 14.15        | IP     |
| SC1 (%)                              | 53.37      | IP     | 46.90          | IC     | 42.24        | IR     |
| SC2 (%)                              | 42.90      | IS     | 42.77          | IR     | 38.24        | IP     |
| ABC (MPa)                            | 0.52       | IC     | 0.51           | IP     | 0.39         | talik  |
| ALT (m)                              | 2.92       | talik  | 2.85           | IR     | 1.85         | IP     |
| MAGT (°C)                            | -0.43      | talik  | -0.52          | IR     | -1.09        | IR     |
| MAST (°C)                            | 1.29       | talik  | 1.06           | IR     | -0.78        | IL     |

**Table S7.** Response Relationship between ET and Influencing Factors

|                                               | FVC                       | MAP                                               | SM                                                                                        | SR                       | MAAT                                   |
|-----------------------------------------------|---------------------------|---------------------------------------------------|-------------------------------------------------------------------------------------------|--------------------------|----------------------------------------|
| Partial correlation coefficient range         | -0.66~0.90                | -0.87~0.54                                        | -0.48~0.92                                                                                | -0.64~0.62               | -0.26~0.80                             |
| Mean value of partial correlation coefficient | 0.256                     | -0.357                                            | 0.544                                                                                     | 0.017                    | 0.335                                  |
| Significant positive correlation ratio / %    | 6.47                      | 0.00                                              | 48.28                                                                                     | 0.01                     | 1.38                                   |
| Significant negative correlation ratio / %    | 0.01                      | 14.16                                             | 0.00                                                                                      | 0.01                     | 0.00                                   |
| Insignificant positive correlation ratio / %  | 82.87                     | 10.24                                             | 48.54                                                                                     | 45.35                    | 94.79                                  |
| Insignificant negative correlation ratio / %  | 10.65                     | 75.60                                             | 3.18                                                                                      | 54.63                    | 3.83                                   |
| Significant areas ratio / %                   | 6.48*                     | 14.16*                                            | 48.28*                                                                                    | 0.02*                    | 1.38*                                  |
| Significant areas                             | Buqu River,<br>Laowenquan | Beilu River,<br>Fenghuo Mountain,<br>Chumar River | Xidatan,<br>Chumar River,<br>Beilu River,<br>Fenghuo Mountain,<br>Buqu River,<br>Tanggula | Xidatan,<br>Chumar River | Buqu River,<br>Laowenquan,<br>Tanggula |
| Proportion of influence degree / %            | 9.24                      | 12.46                                             | 66.42                                                                                     | 0.08                     | 11.80                                  |

Note: \* indicates significant at the 0.05 level (T two-side significance test).

**Table S8.** Response Relationship between FVC and Influencing Factors

|                                               | ET                                 | MAP                                                     | SM                                                        | SR                                                    | MAAT       |
|-----------------------------------------------|------------------------------------|---------------------------------------------------------|-----------------------------------------------------------|-------------------------------------------------------|------------|
| Partial correlation coefficient range         | -0.66~0.91                         | -0.84~0.68                                              | -0.87~0.73                                                | -0.77~0.69                                            | -0.82~0.60 |
| Mean value of partial correlation coefficient | 0.255                              | 0.055                                                   | -0.084                                                    | 0.278                                                 | -0.073     |
| Significant positive correlation ratio / %    | 6.32                               | 0.07                                                    | 0.04                                                      | 0.31                                                  | 0.00       |
| Significant negative correlation ratio / %    | 0.01                               | 0.18                                                    | 2.13                                                      | 0.01                                                  | 0.14       |
| Insignificant positive correlation ratio / %  | 82.75                              | 63.78                                                   | 38.28                                                     | 97.22                                                 | 32.57      |
| Insignificant negative correlation ratio / %  | 10.93                              | 35.97                                                   | 59.55                                                     | 2.46                                                  | 67.29      |
| Significant areas ratio / %                   | 6.33*                              | 0.25*                                                   | 2.17*                                                     | 0.32*                                                 | 0.14*      |
| Significant areas                             | Wudaoliang, Buqu River, Laowenquan | Kunlun Mountain, Qingshui River, Wudaoliang, Buqu River | Xidatan, Wudaoliang, Tuotuo River, Buqu River, Laowenquan | Xidatan, Qingshui River, Fenghuo Mountain, Buqu River | Buqu River |
| Proportion of influence degree                | 39.48                              | 5.76                                                    | 7.66                                                      | 45.09                                                 | 2.01       |

Note: \* indicates significant at the 0.05 level (T two-side significance test).



**Table S9.** Response Relationship between SM and Influencing Factors

|                                               | ET            | MAP         | SM            | SR           | MAAT        |
|-----------------------------------------------|---------------|-------------|---------------|--------------|-------------|
| Partial correlation coefficient range         | -0.48~0.92    | -0.89~0.73  | -0.51~0.96    | -0.74~0.46   | -0.82~0.62  |
| Mean value of partial correlation coefficient | 0.546         | -0.085      | 0.454         | -0.318       | -0.301      |
| Significant positive correlation ratio / %    | 48.57         | 0.04        | 35.08         | 0.00         | 0.02        |
| Significant negative correlation ratio / %    | 0.00          | 2.16        | 0.00          | 11.54        | 1.68        |
| Insignificant positive correlation ratio / %  | 48.24         | 38.26       | 51.53         | 9.72         | 9.48        |
| Insignificant negative correlation ratio / %  | 3.19          | 59.54       | 13.38         | 78.74        | 88.82       |
| Significant areas ratio / %                   | 48.57*        | 2.19*       | 35.08*        | 11.51        | 1.70        |
|                                               | Xidatan,      |             |               |              |             |
|                                               | Chumar River, |             |               | Xidatan,     |             |
|                                               | Wudaoliang,   |             | Qingshui      | Budongquan,  |             |
|                                               | Fenghuo       | Buqu River, | River, Tuotuo | Qingshui     | Buqu River, |
|                                               | Mountain,     | Laowenquan  | River         | River, Beilu | Laowenquan  |
|                                               | Buqu River,   |             |               | River        |             |
|                                               | Tanggula      |             |               |              |             |
| Proportion of influence degree                | 43.30         | 0.31        | 45.67         | 9.04         | 1.67        |

Note: \* indicates significant at the 0.05 level (T two-side significance test).

**Table S10.** Response Relationship between ABC and Influencing Factors

|                                               | ALT                                                          | FVC        | MAST                                                                                   | MAP                                                                                                | SM                                                       | SR                           | MAAT                                                            |
|-----------------------------------------------|--------------------------------------------------------------|------------|----------------------------------------------------------------------------------------|----------------------------------------------------------------------------------------------------|----------------------------------------------------------|------------------------------|-----------------------------------------------------------------|
| partial correlation coefficient range         | -0.95~0.98                                                   | -0.96~0.90 | -0.98~0.93                                                                             | -0.97~0.92                                                                                         | -0.98~0.96                                               | -0.89~0.96                   | -0.99~0.71                                                      |
| Mean value of partial correlation coefficient | -0.014                                                       | 0.042      | -0.045                                                                                 | -0.060                                                                                             | -0.021                                                   | 0.043                        | -0.618                                                          |
| Significant positive correlation ratio / %    | 18.63                                                        | 2.38       | 2.01                                                                                   | 0.76                                                                                               | 12.92                                                    | 3.63                         | 0.01                                                            |
| Significant negative correlation ratio / %    | 19.00                                                        | 2.68       | 3.78                                                                                   | 1.65                                                                                               | 18.30                                                    | 2.13                         | 52.10                                                           |
| Insignificant positive correlation ratio / %  | 29.73                                                        | 57.17      | 43.92                                                                                  | 46.91                                                                                              | 38.43                                                    | 51.72                        | 7.91                                                            |
| Insignificant negative correlation ratio / %  | 32.64                                                        | 37.77      | 50.29                                                                                  | 50.68                                                                                              | 30.35                                                    | 42.52                        | 39.97                                                           |
| Significant areas ratio / %                   | 37.63*                                                       | 5.06*      | 5.79*                                                                                  | 2.41*                                                                                              | 31.22*                                                   | 5.76*                        | 52.11*                                                          |
| Significant areas                             | Kumlun Mountain,<br>Chumar River, Beilu<br>River, Laowenquan | Laowenquan | Xidatan,<br>Budongquan,<br>Chumar River,<br>Beilu River,<br>TuotuoRiver,<br>Buqu River | Kunlun Mountain,<br>Chumar River, Beilu<br>River, Fenghuo<br>Mountain, Tuotuo<br>River, Buqu River | Budongquan,<br>Chumaer River,<br>Kaixinling,<br>Tanggula | Beilu River,<br>Tuotuo River | Xidatan,<br>Wudaoliang,<br>Beilu River, Buqu<br>River, Tanggula |
| Proportion of influence degree / %            | 45.88                                                        | 0.88       | 5.25                                                                                   | 13.35                                                                                              | 32.76                                                    | 1.89                         | -                                                               |

Note: \* indicates significant at the 0.05 level (T two-side significance test).

**Table S11.** Response Relationship between ALT and Influencing Factors

|                                               | ET                  | FVC           | MAST           | MAP                 | SM                  | SR               | MAAT             |
|-----------------------------------------------|---------------------|---------------|----------------|---------------------|---------------------|------------------|------------------|
| partial correlation coefficient range         | -0.92~0.85          | -0.73~0.91    | -0.95~0.88     | -0.94~0.94          | -0.89~0.96          | -0.76~0.92       | -0.97~0.99       |
| Mean value of partial correlation coefficient | -0.286              | 0.242         | -0.108         | -0.196              | 0.467               | 0.152            | 0.754            |
| Significant positive correlation ratio / %    | 4.25                | 0.01          | 2.27           | 1.39                | 0.52                | 0.02             | 5.27             |
| Significant negative correlation ratio / %    | 17.49               | 82.65         | 36.20          | 23.85               | 73.69               | 68.97            | 2.96             |
| Insignificant positive correlation ratio / %  | 77.92               | 14.94         | 61.08          | 74.39               | 7.20                | 29.55            | 1.31             |
| Insignificant negative correlation ratio / %  | -0.286              | 0.242         | -0.108         | -0.196              | 0.467               | 0.152            | 0.754            |
| Significant areas ratio / %                   | 4.58*               | 2.40*         | 2.72*          | 2.41*               | 19.10*              | 1.48*            | 95.73*           |
| Significant areas                             | Xidatan, Xieshui    |               |                | Kunlun Mountain,    | Xidatan, Kunlun     |                  | Kunlun           |
|                                               | River, Fenghuo      | Chumar River, | Xieshui River, | Chumar River, Beilu | Mountain, Xieshui   | Xidatan, Xieshui | Mountain,        |
|                                               | mountain, Tuotuo    | Kaixinling,   | Chumar River,  | River, Fenghuo      | River, Beilu River, | River, Chumar    | Wudaoliang,      |
|                                               | River, Kaixingling, | Buqu River    | Beilu River    | Mountain, Tuotuo    | Fenghuo Mountain,   | River, Beilu     | Fenghuo          |
|                                               | Buqu River          |               |                | River, Buqu River   | Tuotuo River, Buqu  | River, Fenghuo   | Mountain, Tuotuo |
|                                               |                     |               |                |                     | River               | Mountain         | River, Tanggula  |
| Proportion of influence degree / %            | 4.95                | 3.01          | 14.35          | 1.24                | 71.87               | 4.58             | -                |

Note: \* indicates significant at the 0.05 level (T two-side significance test).

**Table S12.** Response Relationship between MAGT and Influencing Factors

|                                               | ET                  | FVC        | MAST          | MAP          | SM            | SR               | MAAT          |
|-----------------------------------------------|---------------------|------------|---------------|--------------|---------------|------------------|---------------|
| partial correlation coefficient range         | -0.96~0.86          | -0.82~0.82 | -0.95~0.94    | -0.91~0.89   | -0.92~0.95    | -0.93~0.94       | -0.55~0.99    |
| Mean value of partial correlation coefficient | -0.018              | 0.005      | 0.014         | -0.004       | 0.036         | -0.018           | 0.936         |
| Significant positive correlation ratio / %    | 17.31               | 0.48       | 3.26          | 0.59         | 5.18          | 2.54             | 99.73         |
| Significant negative correlation ratio / %    | 19.05               | 0.84       | 2.58          | 1.55         | 3.78          | 4.41             | 0.00          |
| Insignificant positive correlation ratio / %  | 31.80               | 52.14      | 48.36         | 50.33        | 48.83         | 46.63            | 0.27          |
| Insignificant negative correlation ratio / %  | 31.84               | 46.54      | 45.80         | 47.54        | 42.20         | 46.43            | 0             |
| Significant areas ratio / %                   | 4.58*               | 1.32*      | 2.72*         | 2.41*        | 8.96*         | 6.94*            | 99.73*        |
| Significant areas                             | Kunlun Mountain,    |            | Xidatan,      |              |               |                  | Xidatan,      |
|                                               | Xieshui River,      |            | Chumar River, | Xidatan,     |               | Beilu River,     |               |
|                                               | Wudaoliang, Tuotuo  | Kaixinling | Wudaoliang,   | Budongquan,  | Tuotuo River, | Kaixinling, Buqu | Wudaoliang,   |
|                                               | River, Kaixingling, |            | Tuotuo River, | Tuotuo River | Tanggula      | River            | Tuotuo River, |
|                                               | Laowenquan          |            | Buqu River    |              |               |                  | Tanggula      |
| Proportion of influence degree / %            | 82.36               | 0.27       | 2.50          | 3.75         | 8.66          | 2.46             | -             |

Note: \* indicates significant at the 0.05 level (T two-side significance test).

**Table S13.** Response Relationship between MAST and Influencing Factors

|                                               | ET                 | FVC           | MAP               | SM                 | SR                | MAAT               |
|-----------------------------------------------|--------------------|---------------|-------------------|--------------------|-------------------|--------------------|
| partial correlation coefficient range         | -0.70~0.94         | -0.93~0.72    | -0.90~0.91        | -0.96~0.87         | -0.75~0.94        | -0.89~0.82         |
| Mean value of partial correlation coefficient | 0.386              | -0.209        | 0.136             | -0.467             | 0.132             | -0.160             |
| Significant positive correlation ratio / %    | 0.55               | 3.00          | 0.20              | 3.32               | 0.05              | 16.03              |
| Significant negative correlation ratio / %    | 3.98               | 0.05          | 36.93             | 1.30               | 6.41              | 0.04               |
| Insignificant positive correlation ratio / %  | 30.18              | 65.05         | 10.11             | 63.82              | 25.19             | 75.11              |
| Insignificant negative correlation ratio / %  | 65.28              | 31.90         | 52.76             | 31.56              | 68.35             | 8.82               |
| Significant areas ratio / %                   | 4.53*              | 3.05*         | 37.14*            | 4.62*              | 4.62*             | 16.07*             |
| Significant areas                             |                    |               |                   | Xidatan,           |                   | Xidatan,           |
|                                               | Budongquan,        |               |                   | Budongquan,        |                   | Budongquan,        |
|                                               | Wudaoliang, Tuotuo | Tuotuo River, | Fenghuo Mountain, | Chumar River,      | Fenghuo Mountain, | Chumar River,      |
|                                               | River, Tanggula    | Tanggula      | Tanggula          | Wudaoliang, Tuotuo | Laowenquan        | Wudaoliang, Tuotuo |
|                                               |                    |               |                   | River, Tanggula    |                   | River, Kaixinling  |
| Proportion of influence degree / %            | 4.42               | 5.35          | 53.76             | 4.68               | 6.56              | 25.24              |

Note: \* indicates significant at the 0.05 level (T two-side significance test).

## References

57. [dataset] Peng, S.Z. 1-km monthly mean temperature dataset for china (1901-2017). National Tibetan Plateau Data Center. 2019. doi: 10.11888/Meteoro.tpd.270961.
58. [dataset] Peng, S.Z. 1-km monthly precipitation dataset for China (1901-2017). National Tibetan Plateau Data Center. 2020. doi: 10.5281/zenodo.3185722.
59. [dataset] Feng, F.; Wang, K.C. High spatial resolution (10km) surface solar radiation dataset with by merging sunshine hours over China China (1983-2017). National Tibetan Plateau Data Center. 2020. doi:10.11888/Meteoro.tpd.271023.
60. [dataset] Ma, N.; Szilagyi, J.; Zhang, Y.S.; Liu, W.B. Terrestrial evapotranspiration dataset across China (1982-2017). National Tibetan Plateau Data Center. 2019. doi: 10.11888/AtmosPhys.tpe.249493.file.
61. [dataset] Mao, K.B. SMC dataset: Soil Moisture in China dataset (2002-2018). National Tibetan Plateau Data Center. 2021. doi: 10.5281/zenodo.4738556.
62. [dataset] Shang, G.W.; Dai, Y.J. A China soil characteristics dataset (2010).National Tibetan Plateau Data Center. 2019. doi: 10.11888/Soil.tpd.270466.
63. [dataset] Zhang, X.D.; Zhou, J.; Tang, W.B.; Ding, L.R.; Ma, J.; Zhang, X. Daily 1-km all-weather land surface temperature dataset for the Chinese landmass and its surrounding areas (TRIMS LST; 2000-2020). National Tibetan Plateau Data Center. 2021. doi: 10.11888/Meteoro.tpd.271252.
64. [dataset] Yang, K.; He, J. China meteorological forcing dataset (1979-2018). National Tibetan Plateau Data Center. 2019. doi: 10.11888/AtmosphericPhysics.tpe.249369.file.
65. [dataset] Zhang, G.Q. China lake dataset (1960s-2020). National Tibetan Plateau Data Center. 2019. doi:10.11888/Hydro.tpd.270302.
